# Supplementary material
Source: publisher figshare collection journal article supplement (https://gsapubs.figshare.com/ndownloader/files/22615871)
Supplement: Supplementary file 1 [file 22615871]

## Sheet: 工作表3
Sample	Lithology	SiO2(wt%)	TiO2(wt%)	Al2O3(wt%)	Fe2O3(wt%)	MnO(wt%)	MgO(wt%)	CaO(wt%)	Na2O(wt%)	K2O(wt%)	P2O5(wt%)	LOI(wt%)	Total(wt%)	Li(ppm)	Be(ppm)	Sc(ppm)	V(ppm)	Cr(ppm)	Co(ppm)	Ni(ppm)	Cu(ppm)	Zn(ppm)	Ga(ppm)	Rb(ppm)	Sr(ppm)	Y(ppm)	Zr(ppm)	Nb(ppm)	Cs(ppm)	Ba(ppm)	La(ppm)	Ce(ppm)	Pr(ppm)	Nd(ppm)	Sm(ppm)	Eu(ppm)	Gd(ppm)	Tb(ppm)	Dy(ppm)	Ho(ppm)	Er(ppm)	Tm(ppm)	Yb(ppm)	Lu(ppm)	Hf(ppm)	Ta(ppm)	Tl(ppm)	Pb(ppm)	Th(ppm)
17ALS09-2	sandstone	68.369	0.741	12.229	4.1	0.074	1.958	3.302	4.07	1.083	0.099	3.773	99.798	24.8424	1.27715	10.2172	86.8786	104.857	9.75987	24.3435	10.4934	44.5142	14.1166	35.9463	243.918	19.0027	154.936	6.122	1.3316	263.234	16.8514	36.7001	4.31124	16.7728	3.62705	0.771548	3.1078	0.541273	3.3819	0.677873	2.01869	0.295871	1.94695	0.306105	4.10766	0.498236	0.222581	10.9863	6.05496
17ALS11-2	sandstone	79.785	0.379	8.273	2.268	0.076	0.434	2.479	1.624	1.795	0.085	2.857	100.055	3.33732	1.13208	4.79066	45.4879	40.5545	4.66193	13.3543	13.6341	31.6198	9.60072	62.3702	112.383	18.7034	142.445	7.04559	2.63769	273.123	22.9305	46.0929	5.15911	19.8038	3.69548	0.762167	3.20357	0.549978	3.12585	0.651968	1.88045	0.290487	1.877	0.290418	3.70676	0.540202	0.38585	8.83289	7.67695
17ALS12-2	sandstone	70.227	0.35	9.286	1.75	0.131	0.708	6.96	3.399	0.82	0.076	6.19	99.897	12.5617	0.781978	5.5395	40.5021	24.0336	4.62622	13.1727	10.5291	27.9405	9.30854	30.2747	219.77	19.5717	130.32	5.63855	1.42329	156.515	15.0781	30.4773	3.62823	14.0374	3.1316	0.720022	2.75585	0.53809	3.16756	0.634287	1.88437	0.292797	1.83215	0.275381	3.21389	0.456037	0.177879	13.0938	5.55754
17ALS15-2	sandstone	69.399	0.398	11.312	2.576	0.042	1.38	4.777	4.525	0.542	0.076	4.604	99.631	17.8344	0.97179	8.18884	52.2976	40.8747	6.28017	16.9944	9.33826	25.9702	11.059	21.1587	389.27	17.4707	114.099	4.45772	1.23441	451.377	13.0698	27.774	3.44527	13.4366	2.88077	0.701532	2.7767	0.488182	2.92146	0.623666	1.83591	0.280967	1.78592	0.262023	3.06049	0.400794	0.350376	8.7233	5.55401
17ALS16	sandstone	69.463	0.524	13.223	3.549	0.049	1.959	2.461	4.464	1.432	0.093	2.741	99.958	21.7497	1.29731	10.1624	76.925	59.3373	9.55717	24.5068	12.9614	35.1789	14.0735	46.2383	295.945	17.3694	136.064	5.24649	1.50247	421.574	13.1365	29.2569	3.4605	14.1323	2.875	0.78619	2.74402	0.484275	2.9766	0.611386	1.84829	0.292885	1.86075	0.294058	3.58044	0.454928	0.330633	11.8946	5.57043
17ALS17	sandstone	71.265	0.45	14.156	3.272	0.054	1.318	1.336	4.792	1.162	0.087	2.073	99.965	20.7148	1.85166	7.74164	60.8998	35.04	7.0009	20.6116	8.80357	42.8937	16.2543	47.2736	298.461	18.0939	129.908	6.7443	1.64154	266.507	14.8532	31.6097	3.74529	14.3067	2.94315	0.71327	2.95716	0.504557	3.07979	0.634144	1.84886	0.293455	1.91434	0.298449	3.65696	0.533687	0.29624	15.27	6.86868
17ALS37-2	sandstone	57.993	0.547	11.521	3.254	0.137	1.669	10.368	3.175	1.588	0.13	9.476	99.858	22.4378	1.28094	9.01848	65.7882	63.1712	8.88344	22.7867	10.147	35.5428	12.5246	49.626	303.542	22.4755	129.299	4.89192	2.38143	617.091	13.917	30.9284	3.78906	15.4202	3.55723	0.812823	3.26927	0.576412	3.57393	0.786975	2.2794	0.352899	2.29959	0.345655	3.31467	0.391504	0.340358	10.1854	5.33389
17ALS40-2	sandstone	72.773	0.329	10.547	2.122	0.058	0.806	4.326	3.476	1.155	0.08	4.314	99.986	11.0513	1.08239	4.79149	43.3144	22.1064	3.82544	9.92426	7.32462	25.6968	11.0345	44.9219	143.844	16.2261	147.981	5.5897	1.72072	350.04	14.183	26.7996	3.2992	13.1875	2.61447	0.67055	2.34574	0.391372	2.69906	0.530213	1.64793	0.274437	1.74841	0.282095	3.89007	0.447199	0.272333	4.36022	7.31177
17ALS41-2	sandstone	57.852	0.185	8.2	1.087	0.196	0.577	14.986	2.794	1.065	0.057	12.756	99.755	6.85665	0.728721	3.28596	21.5522	12.9107	3.49433	10.6689	4.18902	12.944	8.44897	36.9661	578.201	13.4707	89.217	4.0281	1.14774	180.277	14.1629	28.4349	3.2056	11.9235	2.28395	0.657204	1.96915	0.372417	2.09268	0.439473	1.25364	0.190691	1.21939	0.181651	2.26748	0.320798	0.203249	12.5623	4.55841
[truncated: 1 more columns]

## Sheet: 工作表2
Author	Label	Marker	Color	Size	Alpha	Style	Width	SiO2	TiO2	Al2O3	TFe2O3	MnO	MgO	CaO	Na2O	K2O	P2O5	Loi	Total	Mg#	Li	Be	Sc	V	Cr	Co	Ni	Cu	Zn	Ga	Ge	Rb	Sr	Y	Zr	Nb	Cs	Ba	La	Ce	Pr	Nd	Sm	Eu	Gd	Tb	Dy	Ho	Er
ZHAO Zhong-hua, .etc. 2011	blue	o	blue	20	0.6	-	1	57.23	1.23	17.04	6.93	0.07	3.4	5.98	4.13	2.35	0.42	1.05	99.83	0.5	16.4	2.36	7.5	148	73.6	20.1	45.5	30	94.7	21.7	1.07	28.8	1024	12	222	8.8	1.15	844	34.1	74	9.1	36.8	6.5	1.75	5.14	0.62	3.05	0.55	1.35
ZHAO Zhong-hua, .etc. 2011	blue	d	blue	20	0.6	-	1	58.37	1.21	15.84	7.03	0.13	3.05	5.63	3.99	3.17	0.44	0.94	99.8	0.46	28.5	3.49	14.3	131	75	18.8	34.6	21.4	99.7	21.7	1.39	102	715	26	330	15.9	3.24	890	54.4	114	13.9	54.7	9.9	2.1	8.15	1.07	5.66	1.06	2.76
ZHAO Zhong-hua, .etc. 2011	yellow	s	yellow	20	0.6	--	1	50.29	1.98	15.76	10.21	0.13	6.34	7.34	3.61	1.64	0.6	1.67	99.57	0.55	23.3	2.49	19	184	179	34.7	97.9	29.2	105	20.2	1.27	31.8	870	24.6	264	15.2	13.3	589	36.6	82.5	10.7	45.9	9.1	2.44	7.94	1.05	5.55	1.03	2.54
ZHAO Zhong-hua, .etc. 2011	red	^	red	20	0.6	:	1	52.25	2.31	15.43	10.31	0.13	3.78	7.1	3.59	1.7	1	1.92	99.52	0.42	19.9	3.15	18	164	91.5	28.7	29.5	20.2	149	23	1.57	32.9	1025	32.2	415	23.8	1.9	1012	69.1	152	20	79.4	14.5	3.2	11.6	1.45	7.21	1.28	3.13
ZHAO Zhong-hua, .etc. 2011	red	^	red	20	0.6	:	1	53.01	2.27	16.13	9.86	0.09	3.2	6.39	3.94	2.4	0.96	1.26	99.51	0.39	25.1	3.35	18	207	7.7	24.7	15	22.6	138	24.1	1.44	60.4	902	32.1	419	21.4	0.65	1021	72	156	20	79.4	14.1	3.32	11.5	1.43	7.18	1.3	3.22
ZHAO Zhong-hua, .etc. 2011	red	^	red	20	0.6	:	1	53.64	1.41	15.83	7.85	0.13	3.01	7.59	3.56	2.34	0.59	3.65	99.6	0.43	11.9	2.63	16.7	158	118	23.7	52.9	32.3	101	20.8	1.25	92.8	941	30.4	280	13.6	3.55	830	48.2	102	12.5	50.9	9.1	2.29	7.53	0.95	4.79	0.88	2.21
ZHAO Zhong-hua, .etc. 2011	red	^	red	20	0.6	:	1	54.6	1.79	17.06	9.21	0.08	1.64	6.43	4.13	2.41	0.71	1.88	99.94	0.26	21.8	3.05	16.9	160	105	18.6	30.7	28.2	106	22.2	1.29	59.3	995	25.2	337	17.8	5.02	1080	56.1	119	14.8	60.4	10.8	2.69	9.09	1.16	5.82	1.06	2.63
ZHAO Zhong-hua, .etc. 2011	green	*	green	20	0.6	--	1	48.66	1.41	15.31	9.72	0.14	9.59	8.18	3.14	1.57	0.3	1.54	99.56	0.66	17	1.76	25.9	211	466	43.4	200	53.4	77	17.3	1.33	29	700	21.7	150	9.6	3.29	594	21.5	47.1	5.9	25.5	5.6	1.68	5.4	0.8	4.6	0.93	2.43
[truncated: 8 more columns]
